# Supplementary material for: Urinary Concentrations of Bisphenol A and Phthalate Metabolites Measured during Pregnancy and Risk of Preeclampsia
Source: PubMed Central journal article supplement (PMC5047771; doi:10.1289/ehp188), 2016-05-13
Supplement: EHP188.s001.acco.pdf [file EHP188.s001.acco.pdf]

**Note to readers with disabilities:** *EHP* strives to ensure that all journal content is accessible to all readers. However, some figures and Supplemental Material published in *EHP* articles may not conform to [508 standards](#) due to the complexity of the information being presented. If you need assistance accessing journal content, please contact [ehp508@niehs.nih.gov](mailto:ehp508@niehs.nih.gov). Our staff will work with you to assess and meet your accessibility needs within 3 working days.

## **Supplemental Material**

### **Urinary Concentrations of Bisphenol A and Phthalate Metabolites Measured during Pregnancy and Risk of Preeclampsia**

David E. Cantonwine, John D. Meeker, Kelly K. Ferguson, Bhramar Mukherjee, Russ Hauser, and  
Thomas F. McElrath

#### **Table of Contents**

**Table S1.** Specific gravity corrected urinary BPA and phthalate concentrations (ng/mL) geometric means (GM) and 95% Confidence Intervals (95% CI)

**Table S2.** Adjusted hazard ratios [95% confidence intervals] for onset of preeclampsia before 34 weeks of gestation in association with an interquartile range increase in BPA and phthalate metabolite concentrations (ng/mL)

**Table S3.** Adjusted hazard ratios [95% confidence intervals] for onset of preeclampsia in association with an interquartile range increase in BPA and phthalate metabolite concentrations (ng/mL) after removing cases of superimposed preeclampsia

**Table S1.** Specific gravity corrected urinary BPA and phthalate concentrations (ng/mL) geometric means (GM) and 95% Confidence Intervals (95% CI).

|                          | Visit 1<br>(N=479)   | Visit 2<br>(N=422)   | Visit 3<br>(N=412)   | Visit 4<br>(N=380)   |
|--------------------------|----------------------|----------------------|----------------------|----------------------|
|                          | GM (95%CI)           | GM (95%CI)           | GM (95%CI)           | GM (95%CI)           |
| <b>BPA</b>               |                      |                      |                      |                      |
| Cases                    | 1.56 [1.25, 1.94]    | 1.37 [1.10, 1.74]    | 1.39 [1.06, 1.81]    | 1.30 [0.97, 1.76]    |
| Controls                 | 1.32 [1.22, 1.43]    | 1.31 [1.21, 1.42]    | 1.38 [1.27, 1.51]    | 1.34 [1.23, 1.46]    |
| <b>MEHP</b>              |                      |                      |                      |                      |
| Cases                    | 12.0 [7.9, 18.2]     | 10.5 [6.9, 15.9]     | 10.4 [7.5, 14.4]     | 7.5 [4.9, 11.6]      |
| Controls                 | 12.8 [11.3, 14.5]    | 11.4 [10.1, 12.9]    | 9.8 [8.6, 11.0]      | 10.2 [8.9, 11.6]     |
| <b>MEHHP</b>             |                      |                      |                      |                      |
| Cases                    | 43.0 [29.4, 62.9]    | 34.4 [23.5, 50.2]    | 35.2 [24.1, 51.4]    | 32.9 [22.3, 48.3]    |
| Controls                 | 40.6 [35.9, 45.9]    | 34.1 [30.4, 38.2]    | 26.3 [23.2, 29.8]    | 35.0 [30.7, 39.8]    |
| <b>MEOHP</b>             |                      |                      |                      |                      |
| Cases                    | 21.8 [14.9, 31.9]    | 19.1 [13.1, 27.8]    | 21.4 [15.2, 30.1]    | 20.5 [14.4, 29.1]    |
| Controls                 | 19.9 [17.6, 22.5]    | 18.1 [16.2, 20.2]    | 15.2 [13.4, 17.3]    | 20.0 [17.6, 22.7]    |
| <b>MECPP</b>             |                      |                      |                      |                      |
| Cases                    | 68.0 [45.9, 100.7]   | 52.6 [36.0, 76.8]    | 61.1 [43.2, 86.4]*   | 60.5 [40.3, 91.1]    |
| Controls                 | 50.1 [44.5, 56.4]    | 42.0 [37.3, 47.2]    | 36.4 [32.0, 41.4]    | 47.8 [42.0, 54.4]    |
| <b>ΣDEHP<sup>a</sup></b> |                      |                      |                      |                      |
| Cases                    | 0.53 [0.37, 0.78]    | 0.42 [0.30, 0.61]    | 0.46 [0.33, 0.64]    | 0.45 [0.31, 0.64]    |
| Controls                 | 0.45 [0.40, 0.50]    | 0.38 [0.34, 0.43]    | 0.32 [0.28, 0.36]    | 0.41 [0.36, 0.46]    |
| <b>MBzP</b>              |                      |                      |                      |                      |
| Cases                    | 6.7 [4.9, 9.1]       | 8.0 [5.6, 11.4]      | 7.4 [5.7, 9.5]       | 8.2 [5.9, 11.4]      |
| Controls                 | 7.0 [6.3, 7.8]       | 6.8 [6.1, 7.7]       | 6.8 [6.1, 7.7]       | 7.8 [7.0, 8.8]       |
| <b>MBP</b>               |                      |                      |                      |                      |
| Cases                    | 17.7 [14.1, 22.3]    | 19.5 [15.2, 25.0]    | 18.7 [15.6, 22.3]    | 21.3 [16.9, 26.9]    |
| Controls                 | 18.0 [16.4, 19.7]    | 18.1 [16.4, 20.0]    | 17.2 [15.4, 19.2]    | 19.8 [18.0, 21.6]    |
| <b>MiBP</b>              |                      |                      |                      |                      |
| Cases                    | 7.4 [5.8, 9.3]       | 6.9 [5.5, 8.6]       | 6.5 [5.5, 7.8]       | 8.7 [7.1, 10.6]      |
| Controls                 | 7.3 [6.7, 7.8]       | 7.2 [6.6, 7.9]       | 7.4 [6.8, 8.1]       | 9.1 [8.3, 9.9]       |
| <b>MEP</b>               |                      |                      |                      |                      |
| Cases                    | 193.3 [122.4, 305.1] | 170.2 [105.9, 273.5] | 173.5 [103.0, 292.4] | 237.0 [128.8, 435.9] |
| Controls                 | 135.7 [118.0, 156.0] | 144.1 [122.7, 169.1] | 136.5 [116.8, 159.5] | 141.3 [119.4, 167.3] |
| <b>MCCP</b>              |                      |                      |                      |                      |
| Cases                    | 2.4 [1.9, 3.1]       | 1.8 [1.4, 2.4]       | 2.4 [1.7, 3.2]       | 2.2 [1.6, 3.1]       |
| Controls                 | 2.3 [2.0, 2.5]       | 2.4 [2.1, 2.7]       | 1.9 [1.7, 2.1]       | 2.1 [1.9, 2.4]       |

\*p-value < 0.05 between cases and controls Wilcoxon Rank Sum test

<sup>a</sup> nmol/L

**Table S2.** Adjusted hazard ratios [95% confidence intervals] for onset of preeclampsia before 34 weeks of gestation in association with an interquartile range increase in BPA and phthalate metabolite concentrations (ng/mL)

|                               | Average (Visit 1-3) | Visit 1            | Visit 2           | Visit 3            |
|-------------------------------|---------------------|--------------------|-------------------|--------------------|
| <b>&lt; 34 weeks</b>          |                     |                    |                   |                    |
| N (cases, controls)           | (8, 432)            | (8, 431)           | (8, 379)          | (6, 368)           |
| BPA                           | 0.81 [0.19, 3.48]   | 2.63 [0.95, 7.29]  | 0.88 [0.15, 5.32] | 0.25 [0.07, 0.88]* |
| MEHP                          | 0.57 [0.22, 1.43]   | 0.74 [0.29, 1.85]  | 0.49 [0.17, 1.37] | 0.61 [0.26, 1.43]  |
| MEHHP                         | 0.88 [0.31, 2.49]   | 0.93 [0.43, 2.02]  | 0.55 [0.17, 1.75] | 1.29 [0.50, 3.29]  |
| MEOHP                         | 0.68 [0.24, 1.96]   | 0.84 [0.38, 1.83]  | 0.44 [0.14, 1.38] | 1.06 [0.44, 2.59]  |
| MECPP                         | 1.02 [0.35, 2.95]   | 1.04 [0.40, 2.69]  | 0.65 [0.23, 1.85] | 1.32 [0.51, 3.41]  |
| ∑DEHP                         | 0.88 [0.31, 2.50]   | 0.97 [0.39, 2.39]  | 0.57 [0.18, 1.76] | 1.16 [0.44, 3.04]  |
| MBzP                          | 0.61 [0.21, 1.83]   | 0.56 [0.20, 1.60]  | 0.78 [0.22, 2.75] | 0.68 [0.21, 2.21]  |
| MBP                           | 0.35 [0.10, 1.25]   | 0.49 [0.20, 1.25]  | 0.48 [0.11, 2.03] | 0.63 [0.24, 1.63]  |
| MiBP                          | 0.50 [0.24, 1.04]   | 0.57 [0.23, 1.40]  | 0.39 [0.14, 1.10] | 0.63 [0.27, 1.46]  |
| MEP                           | 0.62 [0.22, 1.70]   | 0.59 [0.24, 1.48]  | 0.88 [0.29, 2.71] | 0.62 [0.22, 1.73]  |
| MCPP                          | 0.80 [0.29, 2.20]   | 0.93 [0.43, 2.00]  | 0.70 [0.24, 2.00] | 1.29 [0.49, 3.38]  |
| <b>≥ 34 and &lt; 37 weeks</b> |                     |                    |                   |                    |
| N (cases, controls)           | (23, 432)           | (23, 429)          | (19, 379)         | (21, 368)          |
| BPA                           | 2.06 [1.03, 4.13]*  | 1.64 [0.86, 3.14]  | 1.97 [0.69, 5.61] | 1.40 [0.74, 2.65]  |
| MEHP                          | 0.97 [0.55, 1.72]   | 0.91 [0.53, 1.56]  | 0.98 [0.52, 1.83] | 1.16 [0.70, 1.91]  |
| MEHHP                         | 1.18 [0.63, 2.20]   | 1.03 [0.61, 1.76]  | 1.09 [0.55, 2.13] | 1.44 [0.83, 2.49]  |
| MEOHP                         | 1.36 [0.72, 2.59]   | 1.11 [0.63, 1.96]  | 1.23 [0.64, 2.34] | 1.51 [0.88, 2.60]  |
| MECPP                         | 1.96 [1.09, 3.52]*  | 1.65 [0.93, 2.93]  | 1.60 [0.90, 2.85] | 1.78 [1.05, 3.02]* |
| ∑DEHP                         | 1.53 [0.85, 2.76]   | 1.29 [0.74, 2.24]  | 1.38 [0.74, 2.57] | 1.59 [0.93, 2.69]  |
| MBzP                          | 1.18 [0.65, 2.15]   | 1.31 [0.69, 2.46]  | 1.31 [0.63, 2.73] | 1.27 [0.65, 2.46]  |
| MBP                           | 1.18 [0.67, 2.06]   | 1.36 [0.79, 2.34]  | 1.34 [0.69, 2.63] | 1.14 [0.61, 2.14]  |
| MiBP                          | 0.78 [0.42, 1.47]   | 1.32 [0.65, 2.66]  | 0.93 [0.38, 2.26] | 0.66 [0.38, 1.16]  |
| MEP                           | 1.47 [0.82, 2.65]   | 1.61 [0.93, 2.79]  | 1.23 [0.61, 2.47] | 1.74 [0.91, 3.32]  |
| MCPP                          | 0.97 [0.54, 1.75]   | 1.18 [0.75, 1.83]  | 0.77 [0.39, 1.51] | 1.24 [0.70, 2.20]  |
| <b>≥ 37 weeks</b>             |                     |                    |                   |                    |
| N (cases, controls)           | (19, 432)           | (19, 431)          | (16, 379)         | (17, 368)          |
| BPA                           | 0.78 [0.44, 1.41]   | 1.17 [0.70, 1.96]  | 0.59 [0.26, 1.31] | 0.74 [0.43, 1.28]  |
| MEHP                          | 1.35 [0.94, 1.96]   | 1.25 [0.91, 1.73]  | 1.12 [0.75, 1.67] | 1.17 [0.82, 1.67]  |
| MEHHP                         | 1.33 [0.87, 2.03]   | 1.32 [0.96, 1.80]  | 0.93 [0.59, 1.47] | 1.22 [0.81, 1.82]  |
| MEOHP                         | 1.83 [1.19, 2.80]*  | 1.50 [1.07, 2.09]* | 1.14 [0.74, 1.76] | 1.56 [1.06, 2.30]* |
| MECPP                         | 2.35 [1.59, 3.48]*  | 1.83 [1.28, 2.63]* | 1.31 [0.88, 1.95] | 2.00 [1.37, 2.91]* |
| ∑DEHP                         | 1.86 [1.25, 2.74]*  | 1.55 [1.11, 2.16]* | 1.13 [0.73, 1.72] | 1.63 [1.12, 2.38]* |
| MBzP                          | 1.03 [0.68, 1.57]   | 0.85 [0.57, 1.29]  | 1.15 [0.70, 1.90] | 1.19 [0.75, 1.88]  |
| MBP                           | 1.31 [0.90, 1.91]   | 1.11 [0.74, 1.68]  | 1.10 [0.64, 1.89] | 1.66 [1.13, 2.45]* |

|      |                    |                    |                    |                   |
|------|--------------------|--------------------|--------------------|-------------------|
| MiBP | 1.20 [0.76, 1.88]  | 1.19 [0.76, 1.86]  | 1.07 [0.60, 1.93]  | 1.19 [0.72, 1.97] |
| MEP  | 1.49 [1.00, 2.23]* | 1.78 [1.26, 2.53]* | 1.24 [0.78, 1.96]  | 1.15 [0.71, 1.85] |
| MCP  | 0.99 [0.68, 1.46]  | 1.15 [0.88, 1.51]  | 0.56 [0.34, 0.92]* | 1.39 [0.94, 2.08] |

---

Models adjusted for specific gravity.

\* statistically significant ( $p < 0.05$ )

**Table S3.** Adjusted hazard ratios [95% confidence intervals] for onset of preeclampsia in association with an interquartile range increase in BPA and phthalate metabolite concentrations (ng/mL) after removing cases of superimposed preeclampsia.

| Analyte | Average (Visit 1-3)<br>(34, 406) | Visit 1<br>(34, 405) | Visit 2<br>(28, 366) | Visit 3<br>(30, 359) | Visit 4 <sup>a</sup><br>(24, 341) |
|---------|----------------------------------|----------------------|----------------------|----------------------|-----------------------------------|
| BPA     | 0.83 [0.48, 1.43]                | 1.23 [0.77, 1.96]    | 0.94 [0.45, 1.94]    | 0.58 [0.33, 1.00]    | 1.30 [0.60, 2.81]                 |
| MEHP    | 1.64 [1.17, 2.30]*               | 1.36 [1.02, 1.81]*   | 1.22 [0.84, 1.78]    | 1.73 [1.24, 2.42]*   | 2.54 [1.59, 4.06]*                |
| MEHHP   | 1.22 [0.83, 1.81]                | 1.18 [0.88, 1.58]    | 0.85 [0.55, 1.30]    | 1.43 [0.97, 2.11]    | 3.38 [1.81, 6.29]*                |
| MEOHP   | 1.68 [1.13, 2.49]*               | 1.35 [0.98, 1.85]    | 1.13 [0.75, 1.70]    | 1.85 [1.27, 2.70]*   | 3.92 [2.00, 7.68]*                |
| MECPP   | 2.46 [1.68, 3.59]*               | 1.86 [1.32, 2.62]*   | 1.52 [1.05, 2.21]*   | 2.42 [1.66, 3.51]*   | 3.29 [1.73, 6.24]*                |
| ΣDEHP   | 1.84 [1.28, 2.65]*               | 1.48 [1.08, 2.03]*   | 1.25 [0.84, 1.85]    | 2.02 [1.40, 2.91]*   | 3.66 [1.92, 6.98]*                |
| MBzP    | 0.91 [0.59, 1.40]                | 0.86 [0.57, 1.28]    | 0.98 [0.58, 1.65]    | 1.08 [0.64, 1.79]    | 2.95 [1.15, 7.61]*                |
| MBP     | 1.23 [0.83, 1.82]                | 1.19 [0.82, 1.72]    | 0.99 [0.56, 1.76]    | 1.49 [0.98, 2.25]    | 2.28 [1.07, 4.89]*                |
| MiBP    | 0.83 [0.55, 1.26]                | 1.17 [0.78, 1.76]    | 0.80 [0.45, 1.44]    | 0.65 [0.43, 0.96]*   | 1.88 [0.56, 6.33]                 |
| MEP     | 1.66 [1.15, 2.40]*               | 2.16 [1.55, 3.02]*   | 1.21 [0.80, 1.84]    | 1.39 [0.90, 2.14]    | 0.76 [0.45, 1.29]                 |
| MCCP    | 0.95 [0.67, 1.33]                | 1.09 [0.85, 1.40]    | 0.62 [0.39, 1.00]    | 1.53 [1.01, 2.29]*   | 3.22 [1.83, 5.65]*                |

Models adjusted for specific gravity, maternal age, race, BMI, smoking during pregnancy, and infant sex

<sup>a</sup> If exposure measure occurred after preeclampsia diagnosis participants were removed from analysis (N=6)

\* statistically significant (p<0.05)
